# Supplementary material for: Noncoding RNA 886 alleviates tumor cellular immunological rejection in host C57BL/C mice
Source: PubMed Central journal article supplement (PMC7367629; doi:10.1002/cam4.3148), 2020-05-31

# A

## Statistic of Differently Expressed gene

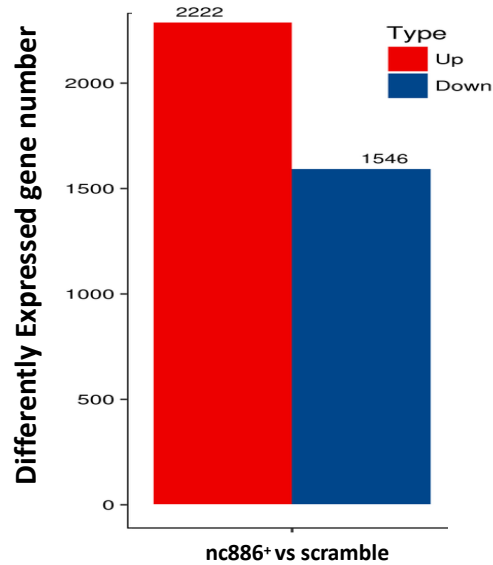

# B

## Gene Ontology nc886+ vs scramble

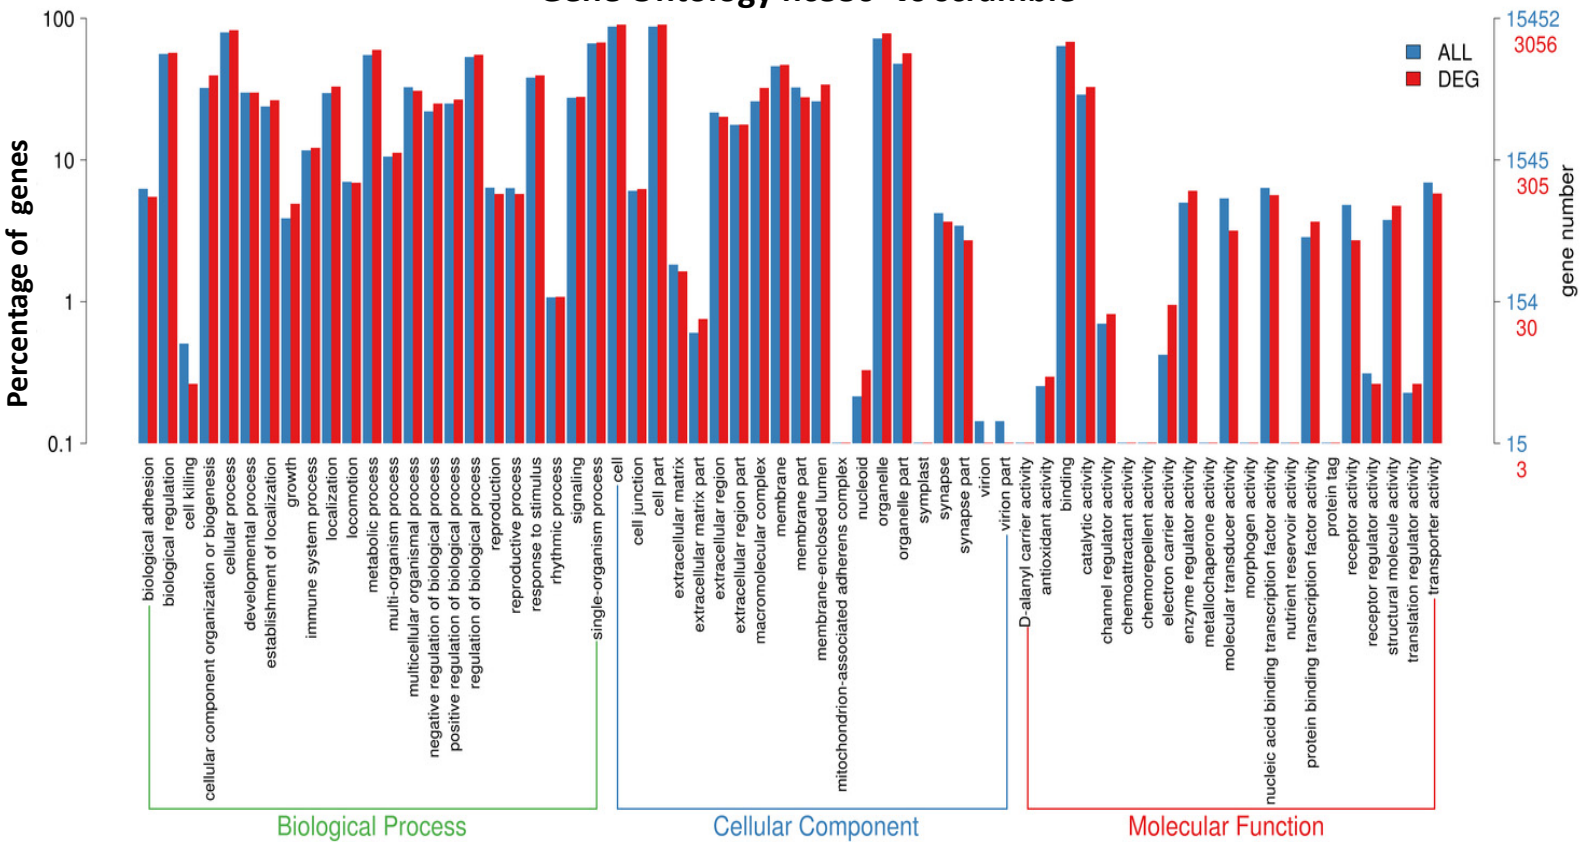

Supplement: CAM4-9-5258-s001.pdf [file CAM4-9-5258-s001.pdf]
