# Supplementary material for: Noncoding RNA 886 alleviates tumor cellular immunological rejection in host C57BL/C mice
Source: PubMed Central journal article supplement (PMC7367629; doi:10.1002/cam4.3148), 2020-05-31
Supplement: CAM4-9-5258-s002.pdf [file CAM4-9-5258-s002.pdf]

**A****( Query, HLA-A, transcript variant 1, mRNA,1261-1440, exon 8)**

```

Query 1261 ACCACCCACCCCATGTCCACCATGACCCTCTTCCCACGCTGACCTGTGCTCCCTCCCC 1320
          |||                                     ||| |   |||||
Sbjct  77  ACC-----CGCGG---GTGCTT----- 90

Query 1321 AATCATCTTTCCTGTTCCAGAGAGGTGGGGCTGAGGTGTCTCCATCTCTGTCTCAACTTC 1380
Sbjct  -----

Query 1381 ATGGTGCACCTGAGCTGTAACCTTCTTCCTTCCCTATTTAAATTAGAACCTTAGTATAAATT 1440
          |||||                                     ||||| |||
Sbjct  91  -----ACTGA-----CCCTTTTA----- 103

```

**B****( Query, TAP1, transcript variant 1, mRNA,241-480, exon 1)**

```

Query 241 GTAGGGGAGGACTCGGCGGTACCCGGAGCTTCAGGCCCCACCGGGGCGCGGAGAGTCCCA 300
          ||||| ||   |||||
Sbjct  1  CGGGTCG---GAGT--- 11

Query 301 GGCCCGGCCGGGACCGGGACGGCGTCCGAGTGCCAATGGCTAGCTCTAGGTGTCCCGCTC 360
          ||||| |||
Sbjct  12  TAGCTCAAG----- 20

Query 361 CCCGCGGGTGCCGCTGCCTCCCGGAGCTTCTCTCGCATGGCTGGGGACAGTACTGCTAC 420
          ||| | |||
Sbjct  21  ---CGGTTACC----- 28

Query 421 TTCTCGCCGACTGGGTGCTGCTCCGGACCGCGCTGCCCCGCATATTCTCCCTGCTGGTGC 480

```

Query ID        NM\_002116.8 (A); NM\_000593.5 (B)  
Subject ID      NR\_030583.3 , Homo sapiens vault RNA 2-1 (VTRNA2-1)
